# Supplementary material for: Serological Screening for Coronavirus Infections in Cats
Source: PubMed Central journal article supplement (PMC6723642; doi:10.3390/v11080743), 2019-08-13
Supplement: viruses-11-00743-s001.pdf [file viruses-11-00743-s001.pdf]

**Table S1.** ELISA reactivity (OD450 values) of 25 FCoV type 1 specific antisera against S1 antigens of different coronaviruses. Table represent the mean OD450 values from three independent experiments. Positive ELISA reactions are colored in orange. Cut-off value is 0.36 and was determine as the 5-fold over the OD of negative sera. The Genbank accession numbers of these viruses are as in table 3.

| serum samples | FCoV type 1 strains for infection | S1 antigens of different coronaviruses |               |         |              |          |              |         |
|---------------|-----------------------------------|----------------------------------------|---------------|---------|--------------|----------|--------------|---------|
|               |                                   | FCoV type1 (UU2)-S1                    | FCoV type2-S1 | PEDV-S1 | HCoV-229E-S1 | PDCoV-S1 | HCoV-NL63-S1 | BCoV-S1 |
| cat 91        | RM                                | 2.603                                  | 1.995         | 1.906   | 0.100        | 0.073    | 0.148        | 0.100   |
| cat 93        | RM                                | 2.923                                  | 0.231         | 0.198   | 0.116        | 0.075    | 0.096        | 0.120   |
| cat 95        | RM                                | 2.931                                  | 0.732         | 0.440   | 0.116        | 0.062    | 0.059        | 0.053   |
| cat 115       | RM                                | 2.619                                  | 1.786         | 1.817   | 0.128        | 0.116    | 0.084        | 0.114   |
| Cat 039       | RM                                | 1.221                                  | 0.173         | 0.153   | 0.053        | 0.098    | 0.099        | 0.093   |
| Cat 055       | RM                                | 1.220                                  | 0.129         | 0.077   | 0.085        | 0.091    | 0.114        | 0.065   |
| Cat 057       | RM                                | 1.001                                  | 0.173         | 0.099   | 0.066        | 0.072    | 0.093        | 0.092   |
| Cat 073       | RM                                | 1.905                                  | 0.240         | 0.123   | 0.096        | 0.109    | 0.113        | 0.064   |
| Cat 109       | RM                                | 1.650                                  | 0.189         | 0.116   | 0.068        | 0.060    | 0.082        | 0.092   |
| cat 129       | UU2                               | 2.537                                  | 0.401         | 0.976   | 0.143        | 0.053    | 0.062        | 0.050   |
| cat131        | UU2                               | 2.858                                  | 0.262         | 0.880   | 0.070        | 0.080    | 0.150        | 0.080   |
| cat 89        | UU2                               | 2.246                                  | 0.125         | 0.244   | 0.071        | 0.106    | 0.087        | 0.130   |
| cat 024       | UU2                               | 1.812                                  | 0.090         | 0.156   | 0.107        | 0.114    | 0.100        | 0.127   |
| cat 058       | UU2                               | 1.607                                  | 0.110         | 0.139   | 0.074        | 0.069    | 0.071        | 0.115   |
| cat 066       | UU2                               | 1.292                                  | 0.065         | 0.066   | 0.101        | 0.144    | 0.080        | 0.085   |
| cat 070       | UU2                               | 1.924                                  | 0.102         | 0.090   | 0.091        | 0.086    | 0.122        | 0.050   |
| cat 164       | UU2                               | 1.151                                  | 0.095         | 0.074   | 0.085        | 0.078    | 0.099        | 0.051   |
| cat 178       | UU2                               | 1.371                                  | 0.127         | 0.147   | 0.114        | 0.082    | 0.081        | 0.068   |
| cat 188       | UU2                               | 1.277                                  | 0.095         | 0.078   | 0.129        | 0.056    | 0.056        | 0.068   |
| cat 200       | UU2                               | 0.640                                  | 0.096         | 0.073   | 0.142        | 0.126    | 0.096        | 0.060   |
| Cat 1         | UU2                               | 2.091                                  | 0.263         | 0.144   | 0.120        | 0.149    | 0.091        | 0.077   |
| Cat 2         | UU2                               | 1.846                                  | 0.172         | 0.155   | 0.090        | 0.083    | 0.100        | 0.144   |
| Cat 3         | UU2                               | 1.566                                  | 0.117         | 0.082   | 0.058        | 0.074    | 0.051        | 0.075   |
| Cat 4         | UU2                               | 2.284                                  | 0.099         | 0.157   | 0.054        | 0.094    | 0.134        | 0.063   |
| Cat 5         | UU2                               | 2.319                                  | 0.105         | 0.099   | 0.095        | 0.067    | 0.116        | 0.058   |
